# Supplementary material
Source: Copernicus journal article supplement (doi:10.5194/egusphere-2026-2310)
Supplement: Supplementary file 1 [file egusphere-2026-2310-supplement.pdf]

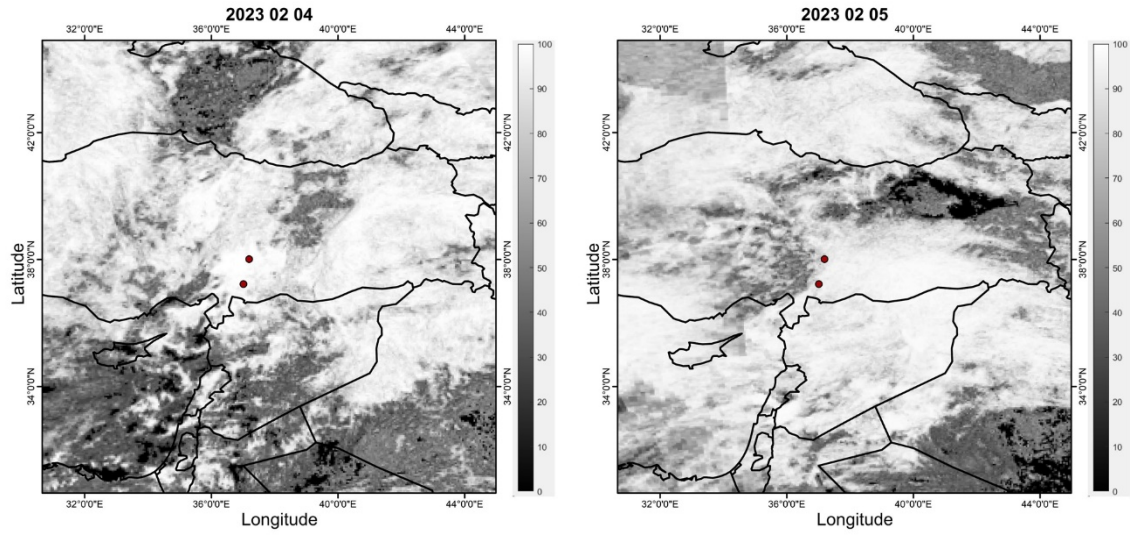

**Figure S1:** Cloud conditions before the earthquake

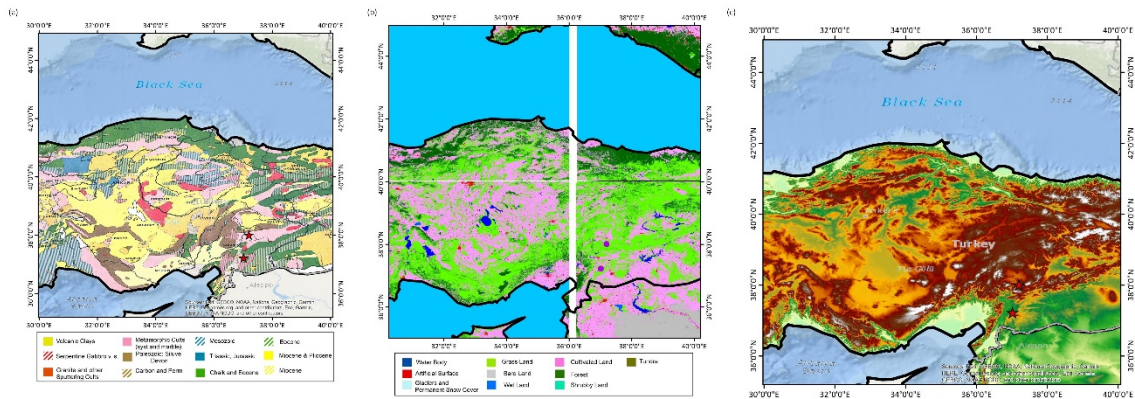

**Figure S2:** LULC, Geology, and DEM of case study area showing topographic variations, land cover classification, and geological formations along the East Anatolian Fault Zone. The base map in (a) and (b) were designed and developed by Esri|Powered by Esri. For more information on this map, visit [https://goto.arcgisonline.com/maps/Ocean\\_Basemap](https://goto.arcgisonline.com/maps/Ocean_Basemap) (last access: 06 June 2026).

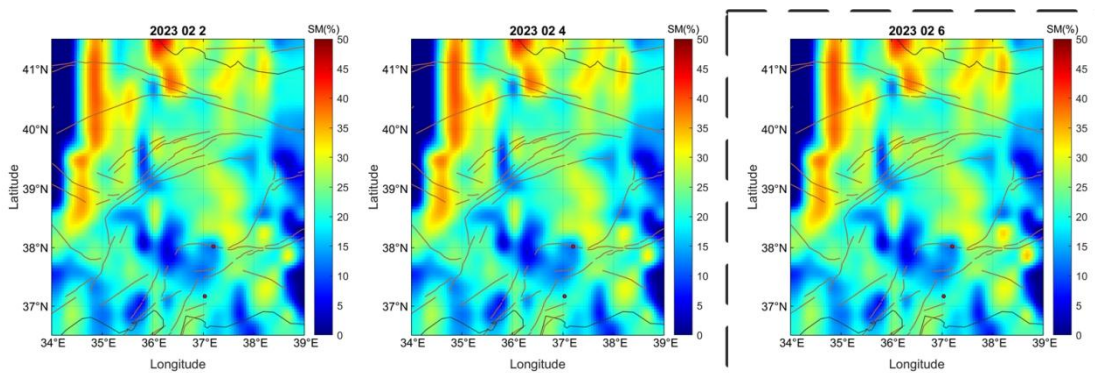

**Figure S3.** Soil moisture conditions prior to earthquake sequences

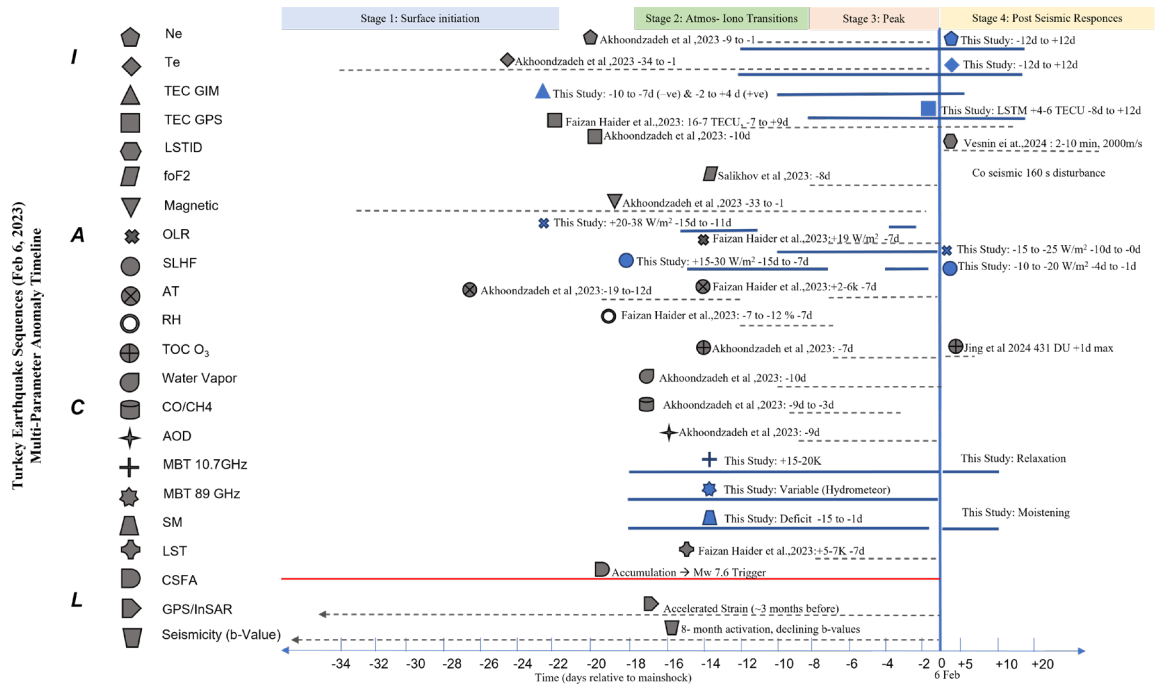

**Figure S4.** Temporal co-existence of the multi parameter anomalies of Turkey 2023 earthquake. The parameters are shown based on the specific literature collected (gray parameters) for Turkey E.Q case along with the new findings in this research (blue parameters) collectively showing the previous and current work together
